1  
2  
3  
4  
5  
6  
7  
8  
9  
10  
11  
12  
13  
14  
15  
16  
17  
18  
19  
20  
21  
22  
23  
24  
25  
26  
27  
28  
29  
30  
31  
32  
33  
34

**Negative curvature-promoting lipids instruct nuclear ingression  
of low autophagic potential vacuoles**

Manon Garcia<sup>1,#</sup>, Sylvain Kumanski<sup>1,#</sup>, Alberto Elías-Villalobos<sup>2</sup>,  
Caroline Soulet<sup>1</sup> and María Moriel-Carretero<sup>1,\*</sup>

*1 Centre de Recherche en Biologie cellulaire de Montpellier (CRBM), Université de Montpellier, Centre National de la Recherche Scientifique, Montpellier, France*

*2 Institut Curie, UMR3244, Paris, France*

# equal contribution

\* correspondence to maria.moriel@crbm.cnrs.fr

**Running Title:** Nuclear ingression of vacuoles impacts autophagy

## 35 Abstract

36 Membrane contact sites are functional nodes at which organelles exchange information  
37 through moving ions, proteins and lipids, thus driving the reorganization of metabolic pathways  
38 and the adaptation to changing cues. The nuclear-vacuole junction of *Saccharomyces*  
39 *cerevisiae* is among the most extensive and better-known organelle contact sites, described to  
40 expand in response to various metabolic stresses. While using genotoxins with unrelated  
41 purposes, we serendipitously discovered a phenomenon that we describe as the most extreme  
42 and intimate contact ever reported between nuclei and vacuoles: the vacuole becomes  
43 completely internalized in the nucleus. We define lipids supporting negative curvature, such as  
44 phosphatidic acid and sterols, as *bona-fide* drivers of this event. Functionally, we purport that  
45 internalized vacuoles are low efficiency ones whose removal from the cytoplasm optimizes  
46 cargo interaction with functional vacuoles. Thus, our findings also point to nucleus-vacuole  
47 interactions as important for metabolic adaptation. Yet, rather than by inter-organelle  
48 exchanges, the underlying mechanism literally concurs with vacuolar sequestration.

49

## 50 Introduction

51 Eukaryotic cells possess a functionally committed system of endomembranes whose  
52 regulated remodeling is essential to warrant adaptation to stresses, changing cues and cell  
53 cycle requirements. Among them, the Endoplasmic Reticulum (ER) is one of the most dynamic,  
54 suffering drastic transitions during ER stress, when the volume of membranes massively  
55 expands to increase its protein folding capacity (1). The perinuclear subdomain of the ER, also  
56 known as the nuclear membrane, is particularly prone to extreme remodeling. Irrespective of  
57 nuclear division occurring in an “open” or in a “closed” manner, the perinuclear ER membranes  
58 will undergo dramatic changes either because of rupture, dispersion and re-assembly, or  
59 because of expansion and deformation (2,3). An important aspect of membrane remodeling  
60 concerns the sites of physical proximity between different endomembrane systems, known as  
61 membrane contact sites (4). At these locations, membranes belonging to two different  
62 organelles, such as the ER and the Golgi, or the mitochondria and the Lipid Droplets, stay in  
63 close proximity (10 to 80 nm), which allows the spatial organization of enzymes involved in a  
64 given metabolic pathway (5), as well as the active exchange of different molecules, such as  
65 lipids and ions (6).

66 A membrane contact site that can become impressively extensive is that between the  
67 nucleus and the vacuole (the equivalent to the lysosome) of the yeast *Saccharomyces*  
68 *cerevisiae*, termed the Nucleus-Vacuole Junction (NVJ). The tether between these two  
69 membranes is actively maintained by the proteins Vac8 and Nvj1, present in the vacuolar and  
70 outer nuclear membranes, respectively (7). Helped by additional factors, such as Snd3 (8), the

71 NVJ expands “zipper-wise” during nutritional stress, such as glucose and aminoacid shortage,  
72 and upon Target Of Rapamycin Complex (TORC) inhibition (9). This increase in the contact  
73 surface can serve to send esterified lipids for storage within Lipid Droplets (9), to increase the  
74 flux of metabolites through the mevalonate pathway (5) or to recycle non-essential nuclear  
75 components (10). This latter process transfers components mostly arising from the nucleolus  
76 directly to the vacuole without the need of transporting vesicles (the autophagosomes). This  
77 way, when the ribosomal DNA in the nucleolus stops being actively transcribed as to spare  
78 energy, the vacuole will degrade both nucleolar proteins that promote active transcription as  
79 well as forming ribosomes, thus helping match a decrease in translation capacity (10–12).

80 But the NVJ is not only important to respond to nutritional shortage. Recently, it has  
81 been shown that the consequences derived from compromising the assembly of nuclear pore  
82 complexes at the nuclear membrane are alleviated by increasing the membrane contact sites  
83 between the nucleus and the vacuole (13). Moreover, the NVJ is a site for the synthesis of long  
84 chain fatty acids that impacts the sphingolipid biosynthetic pathway (14). As such, lack of  
85 appropriate membrane tethering at this location sensitizes cells to sphingolipid synthesis  
86 inhibitors even under basal conditions (15). Since it is emergently recognized that membrane  
87 contacts sites are pro-active in exchanging lipids and signals between organelles (6), it stems  
88 that the contact between the nucleus and the vacuole may still have multiple secrets to deliver.

89 In this work, we define lipid scenarios in which the nucleus and the vacuole interact in  
90 the most extreme manner described up-to-here in the literature. We find that enrichment at  
91 membranes of phosphatidic acid or free sterols promote the internalization of the vacuole  
92 within the nucleus. We note that these lipids support negative curvature of membranes, which  
93 may be key during the invagination process. Yet, given their fusogenic potential, the  
94 phenomenon could be alternatively taking place through membranes fusion. Whichever the  
95 case, we asked whether this concomitant loss of vacuoles from the cytoplasm impacted  
96 general (macro)autophagy of cytoplasmic cargoes and found, to our surprise, that autophagy  
97 is favored this way. We provide arguments to propose that internalized vacuoles are low  
98 efficiency ones whose removal from the cytoplasm optimizes cargo interaction with functional  
99 vacuoles. Our results therefore unveil an unprecedented membrane-remodeling event with  
100 direct impact in metabolic adaptation. Further, our findings question how the invasion of the  
101 nucleoplasmic space by such voluminous bodies affects genome homeostasis.

102

103

104

105 **Results**

106 **1. Identification of unusual structures inside the nucleus during treatment with different**  
107 **genotoxic agents.**

108 In order to undoubtedly identify the nucleus when monitoring the formation of foci by  
109 DNA repair factors, we routinely use the nucleoplasmic protein Pus1 tagged with mCherry in  
110 its N-terminal region (Figure S1A). We realized that, when some genotoxic agents are added  
111 to cell cultures growing exponentially in rich medium, the Pus1 signal in some nuclei became  
112 displaced, or even absent, giving rise to what we informally defined as “holes” (Figure 1A, and  
113 Figure S1B). This serendipitous but repetitive and striking observation prompted us to  
114 investigate the nature of such structures. We therefore systematically quantified the  
115 percentage of cells displaying at least one of these holes upon exposure to different genotoxic  
116 agents. We found that, already basally, 6% of the cells manifested this phenomenon.  
117 Methylmethanosulfonate (MMS) modestly doubled this percentage and, most pronouncedly,  
118 zeocin triggered a time-dependent increase in the frequency of these structures (Figure 1B).  
119 On the contrary, 4-Nitroquinoline 1-oxide (4-NQO), camptothecin (CPT) and hydroxyurea (HU),  
120 genotoxins that affect DNA differently, did not induce the formation of these structures (Figure  
121 1B). All the genotoxic agents used in this set-up provoke cells arrest in different stages of the  
122 cell cycle, which validated their activity (Figure 1C, red asterisks). These data suggest that the  
123 “nuclear holes” phenotype could be unrelated to DNA damage. Zeocin has been reported to  
124 provoke an arrest in G2 during which DNA segregation towards the daughter cell is paused  
125 while nuclear membrane expansion continues, leading to the accumulation of overgrown  
126 nuclear membranes (23). This phenotype is not triggered by HU, as in our case, but it is strongly  
127 elicited by nocodazole. We therefore tested whether nocodazole, a microtubule-  
128 depolymerizing drug, also induces nuclear holes formation, and we found it did robustly (Figure  
129 1D). Both nocodazole and zeocin lead to the accumulation of cells in G2/M phases of the cell  
130 cycle and, as estimated from the cytometry profiles, part of the MMS-treated cells also reaches  
131 this cell cycle stage during our experimental framework (Figure 1C), suggesting that this could  
132 be a necessary trigger. Yet, it is manifestly not sufficient, for cells treated with CPT or 4-NQO  
133 also accumulate in G2/M (Figure 1C) without displaying “nuclear holes” (Figure 1B, S1B). Thus,  
134 the formation of nuclear holes is elicited preferentially (but not sufficiently) in G2/M and does  
135 not seem to require DNA damage *per se*.

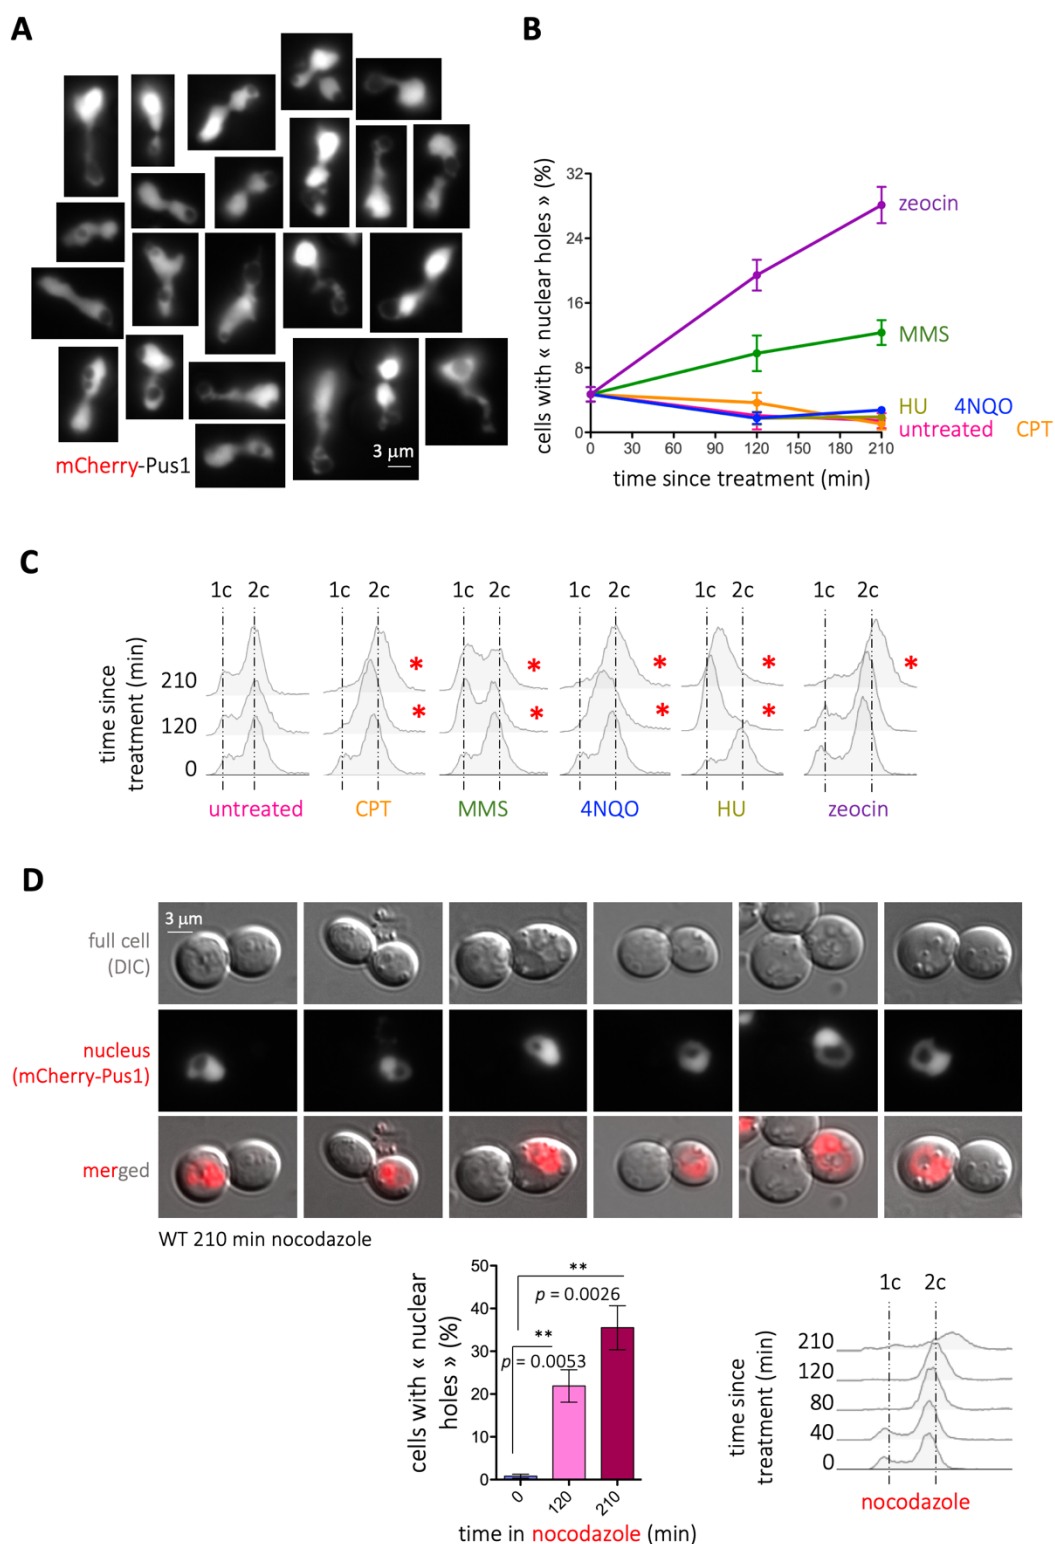

136

137 **Figure 1. Detection of nuclear holes in response to genotoxic agents**

138 (A) Illustrative images of mCherry-Pus1 signals (nuclei) from *Saccharomyces cerevisiae* cells exposed to 100 µg/mL  
 139 zeocin for 210 min in which “black holes” can be observed. Eventual saturated images are so to permit the  
 140 delineation of the Pus1 signal surrounding the holes.

141 (B) Quantification of the percentage of cells displaying nuclear holes in response to the indicated genotoxic agents  
 142 at the indicated time-points. The used doses were 100 µg/mL zeocin, 100 mM HU, 0.1% MMS, 100 µM CPT and  
 143 0.05 mg/L 4-NQO. The plotted values and the error bars are the mean and the Standard Error of the Mean (SEM),

144 respectively, of 3 independent experiments. At least 200 cells were counted per time-point, treatment and  
145 experiment.

146 (C) Cytometry profiles of the experiment shown in (B). 1c and 2c indicate the DNA content. Red asterisks mark  
147 the time-points when alterations in the cell cycle profiles can be detected, as compared to the untreated samples.

148 (D) WT cells bearing the mCherry-Pus1 construct were grown in rich medium to the exponential phase and  
149 exposed to 15  $\mu\text{g}/\text{mL}$  nocodazole for the indicated time. Cells were imaged and 6 examples are shown. The  
150 percentage of cells displaying nuclear holes was calculated and is plotted. The bars and the error bars are the  
151 mean and the SEM, respectively, of 3 independent experiments. At least 200 cells were counted per time-point,  
152 treatment and experiment. The  $p$ -values indicate the statistical significance upon performing a t-test. Cytometry  
153 profiles are shown, where 1c and 2c indicate the DNA content

154

## 155 2. Phosphatidic acid supports the formation of zeocin-triggered nuclear holes.

156 Given the strength of the phenotype, we focused on the treatment with zeocin to  
157 further characterize the phenomenon of nuclear holes formation. As cell cycle progression  
158 relates to nutrient availability, we first tested whether nutritional conditions could have any  
159 impact on the apparition of these structures. Importantly, in marked contrast to what we  
160 observed in rich medium, growing the cells in defined, minimal medium abolished the  
161 formation of nuclear holes in response to zeocin (Figure 2A, pEmpty). Of note, zeocin was  
162 efficiently incorporated in minimal medium-growing cells, as demonstrated by the ability of  
163 the DNA damage sensing factor Tel1 to form zeocin-induced foci (Figure S1C). Together, this  
164 suggests that a factor(s) needed to form the holes, presumably abundant in rich medium, may  
165 become limiting in minimal medium. Although the origin of the holes could be diverse, it was  
166 likely that they derive from transitions at the nuclear membrane. Among the many molecules  
167 needed to remodel membranes whose availability is impacted by nutritional conditions are  
168 lipids. In that context, lipids supporting negative curvature (Figure 2B, yellow phospholipids),  
169 such as Phosphatidic Acid (PA) or DiAcylGlycerol (DAG) (24,25), are expected to be relevant.  
170 Overexpression for 2 h of the PA-generating enzyme Dgk1 (Figure 2C) led to an imperceptible  
171 increase in the presence of nuclear holes (Figure 2A, pDGK1<sup>OE</sup>, time “0”). Yet, maintaining the  
172 overexpression 210 min longer led to 35% of cells displaying nuclear holes (Figure 2A, pDGK1<sup>OE</sup>,  
173 time “210\*”). Moreover, addition of zeocin to Dgk1-overexpressing cells doubled the  
174 percentage of cells displaying nuclear holes in only 20 min, despite growth occurring in minimal  
175 medium, and led to a final 55% of cells bearing the phenotype (Figure 2A, pDGK1<sup>OE</sup>, times “20-  
176 210”). On the contrary, overexpression of the hyper-active Pah1 allele *Pah1-7A*, which  
177 promotes the accumulation of DAG at the expense of PA (Figure 2C), did not provoke any  
178 increase in the percentage of cells displaying nuclear holes, even after 210 min since zeocin  
179 addition (Figure 2A, pPAH1-7A<sup>OE</sup>). These data point at PA as relevant to form nuclear holes,  
180 and exclude DAG molecules as implicated in this process, in spite of their conical shape  
181 promoting negative curvature (24). In support, the reciprocal approach using deletion mutants

182 demonstrated that an excess of PA creates a constitutive presence of nuclear holes in  
 183 approximately half of the population (Figure 2D, *pah1Δ*), but the chronic excess of DAG only  
 184 slightly yet not significantly differed from the isogenic WT strain (Figure 2D, *dgk1Δ*).  
 185

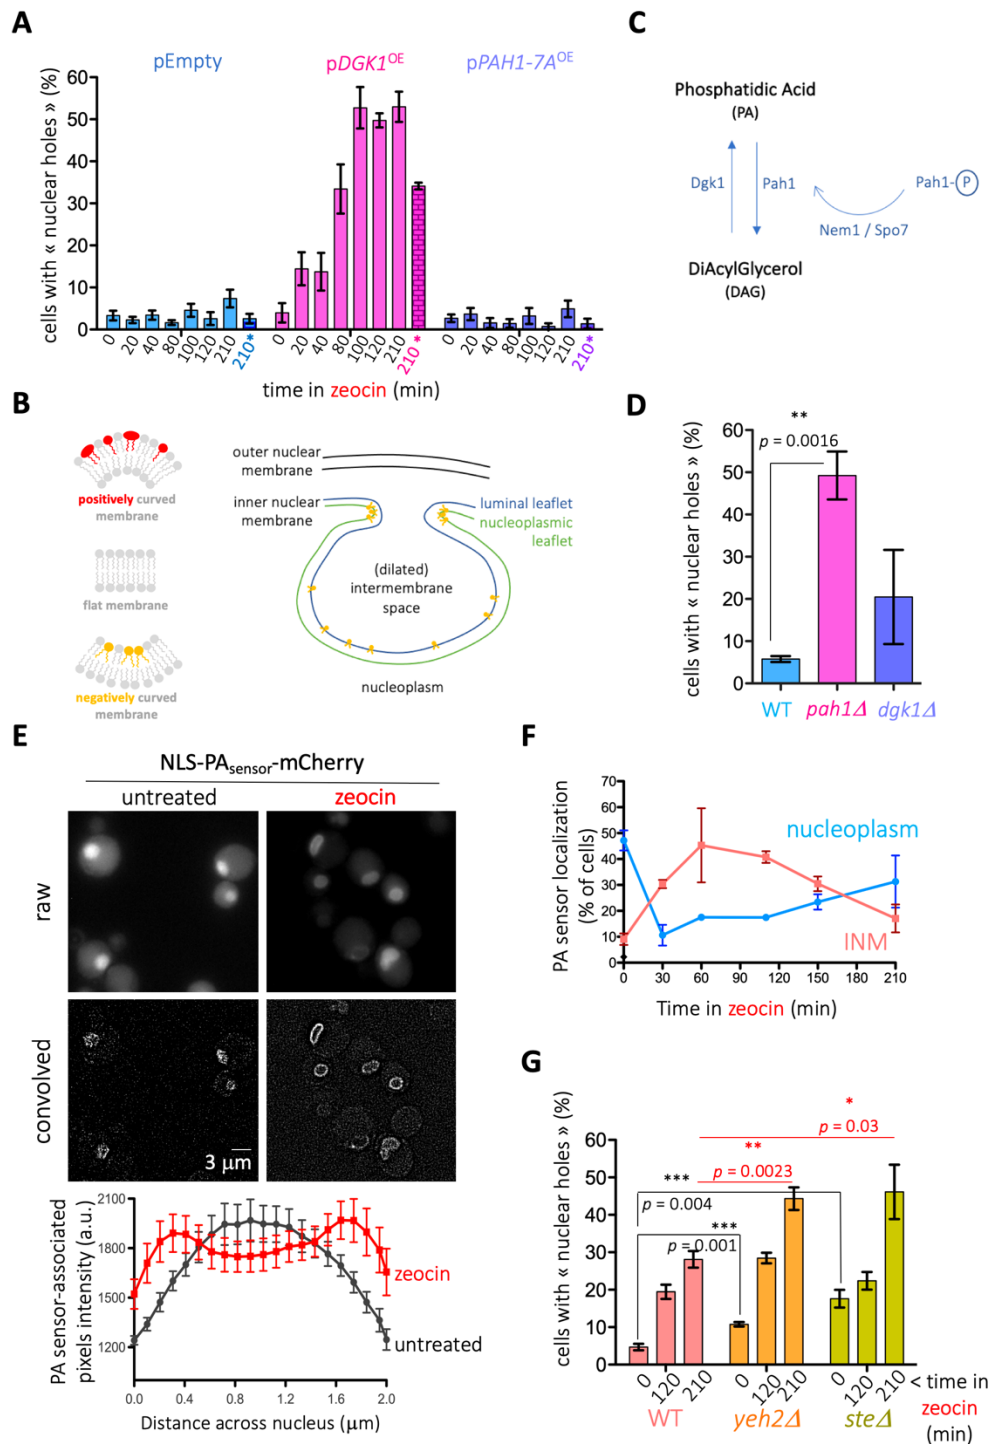

186  
 187 **Figure 2. Lipid determinants of nuclear holes formation**

188 (A) Cells bearing the genomic mCherry-Pus1 construct were grown overnight in minimal medium selective for the  
 189 indicated plasmids with glycerol as the carbon source. The exponential cultures were then supplemented with 2%  
 190 galactose to induce the expression of nothing (pEmpty), of Dgk1 (*pDGK1<sup>OE</sup>*) or of the hyperactive Pah1-7A (*pPAH1-*



191 7A<sup>OE</sup>). Two hours later (time “0”), 100 µg/mL zeocin was added. The indicated time-points therefore indicate the  
192 elapsed time since zeocin addition, with the exception of the last point of each set (“210\*” and marked in color),  
193 which accounts for the impact of the overexpression only. The percentage of cells in the population displaying at  
194 least one nuclear hole was counted. Each bar reflects the mean of 3 independent experiments, and the error bars  
195 account for the SEM. At least 200 cells were considered per time point, condition and experiment.

196 **(B)** Left: simplified scheme of basic membrane curvature set-ups in which conical phospholipids (in yellow) help  
197 shape membranes of negative curvature, cylindrical phospholipids (in grey) give rise to flat membranes and  
198 inverted conical phospholipids (in red) serve to shape positively curved membranes. Right: invaginations (for  
199 simplicity only of the inner nuclear membrane, INM) request negative curvature-promoting phospholipids (in  
200 yellow). This requirement is modest at regions such as the luminal leaflet of the INM, while it is maximal at nascent  
201 sites in the nucleoplasmic leaflet.

202 **(C)** Simplified scheme illustrating the enzymes responsible for PA and DAG synthesis. Pah1 is subjected to  
203 inactivation by phosphorylation (Pah1-P). To bypass the need of the phosphatase Nem1/Spo7 complex in order  
204 to activate it, we have overexpressed a constitutively de-phosphorylated isoform, *Pah1-7A*.

205 **(D)** Cells of the indicated genotypes bearing the genomic mCherry-Pus1 construct and growing exponentially in  
206 rich medium were photographed and the percentage of cells in the population displaying at least one nuclear  
207 hole was counted. Each bar reflects the mean of 3 independent experiments, and the error bars account for the  
208 SEM. At least 200 cells were considered per condition and experiment. The *p*-value indicates the statistical  
209 significance upon performing a t-test.

210 **(E)** (Top) Exponentially growing (in rich medium) WT *S. cerevisiae* cells transformed with a previously validated,  
211 nucleus-directed, mCherry-tagged sensor capable of detecting membrane-bound Phosphatidic Acid (NLS-PA<sub>sensor</sub>-  
212 mCherry (21), derived from the Q2 domain of Opi1 (56)) were treated (or not) with 100 µg/mL zeocin and  
213 inspected by fluorescence microscopy. Representative raw images or its processed counterparts after using the  
214 “convolve” tool in ImageJ are displayed. “zeocin” image belongs to timepoint 110 minutes of (F). Please note that  
215 different intensities among cells may be due to the biosensor being expressed from a plasmid. (Bottom): a line  
216 was drawn through nuclei using the raw images, and pixel intensity values across the line (distance) were plotted  
217 for both zeocin (red line) and untreated (black line) conditions. The graph displays the mean intensity and the  
218 SEM for *n* = 7 at timepoint 110 minutes.

219 **(F)** The same WT cells illustrated in (E) were followed in time after zeocin addition. The percentages of cells  
220 displaying either nucleoplasmic (blue line) or perinuclear (INM: inner nuclear membrane, pink line) localization of  
221 the PA-associated signal are plotted. Please note that the addition of both nucleoplasmic and perinuclear  
222 percentages does not reach 100 %. This is due to the presence in the population of cells displaying either lack of  
223 signal, or vacuolar signal (presumably due to sensor degradation). The plotted values are the mean and the SEM  
224 of 3 independent experiments.

225 **(G)** Cells of the indicated genotypes bearing the genomic mCherry-Pus1 construct and growing exponentially in  
226 rich medium were photographed before 100 µg/mL zeocin addition, and 120 and 210 min later. The percentage  
227 of cells in the population displaying at least one nuclear hole was counted. Each bar reflects the mean of 4 to 7  
228 independent experiments, and the error bars account for the SEM. At least 200 cells were considered per  
229 condition and experiment. The *p*-values indicate the statistical significance upon performing the annotated t-  
230 tests.

231

232 If PA is important to trigger transitions at the nuclear membrane in response to zeocin,  
233 then zeocin treatment is expected to trigger PA accumulation or redistribution, at least at the



234 inner nuclear membrane (INM). We used a nucleus-targeted fluorescent PA biosensor  
235 (description in the legend of Figure 2E), whose correct localization could be determined by its  
236 basal nucleoplasmic diffuse signal (Figure 2E, top left). We then treated cells growing  
237 exponentially in rich medium with zeocin and monitored the localization of the PA biosensor  
238 signal in time. Importantly, the biosensor signals became perinuclear (Figure 2E, top right),  
239 peaking at 60 to 100 min after zeocin treatment (Figure 2F). Later on, the PA biosensor  
240 progressively became nucleoplasmic again, indicative of PA detection at the INM being  
241 transient (Figure 2F). As a control for the specificity of this behavior, we were unable to observe  
242 this transient signal enrichment at the INM if the experiment was performed in minimal  
243 medium. Thus, PA seems to be a key molecule in promoting the formation of nuclear holes in  
244 general, and in response to zeocin in particular.

245

### 246 3. Sterols co-operate in the formation and maintenance of nuclear holes

247 Apart from PA or DAG, sterols have demonstrated to promote negative curvature at  
248 biological membranes (25). In order to increase the concentration of sterols in membranes and  
249 assess their putative contribution to nuclear holes formation, we used mutant strains either  
250 impaired in the storage within cytoplasmic LD of free sterols (*are1Δ are2Δ*, simplified in the  
251 literature as *steΔ*) or unable to release sterols from membranes (*yeh2Δ*) (26). Importantly, both  
252 mutants modestly but reproducibly displayed nuclear holes in a basal manner (Figure 2G).  
253 Addition of zeocin led to an additive formation of nuclear holes (Figure 2G). Thus, membrane-  
254 embedded sterols are not needed to form nuclear holes in response to zeocin yet can act as  
255 adjuvants, perhaps by favoring a membrane context that is more susceptible to their genesis.

256

### 257 4. Nuclear holes do not necessarily associate to the nucleolus

258 The structures under study could therefore relate to invaginations from the inner or  
259 from the whole nuclear membrane, or even fusion events with cytoplasmic structures. Since  
260 the part of the nuclear membrane associated to the nucleolus is repeatedly reported as prone  
261 to expansion and to support lipid transitions (23,27–29), we next assessed the position of  
262 nuclear black holes with respect to the nucleolus. To do so, we used two fluorescent nucleolar  
263 markers: either Nop1-CFP, a protein soluble in the nucleolus (19); or Net1-GFP, a ribosomal  
264 DNA-bound factor (20). We found that, irrespective of the marker, the nucleolus was  
265 frequently close to the holes (Figure 3A). Yet, the percentage of cells displaying the black hole  
266 inside the nucleolus (i.e. the hole was irrefutably in the middle of the nucleolar signal)  
267 accounted for a small percentage of all the events, and this even in genetic contexts where  
268 black holes were very frequent, such as in the *pah1Δ* strain, or in its genetic mimic *nem1Δ*  
269 (Figure 3B). Thus, either the formation of the holes does not necessarily relate to the nuclear

270 membrane adjacent to the nucleolus, or it does but holes display mobility that makes them  
 271 diffuse away from this nuclear subdomain.  
 272

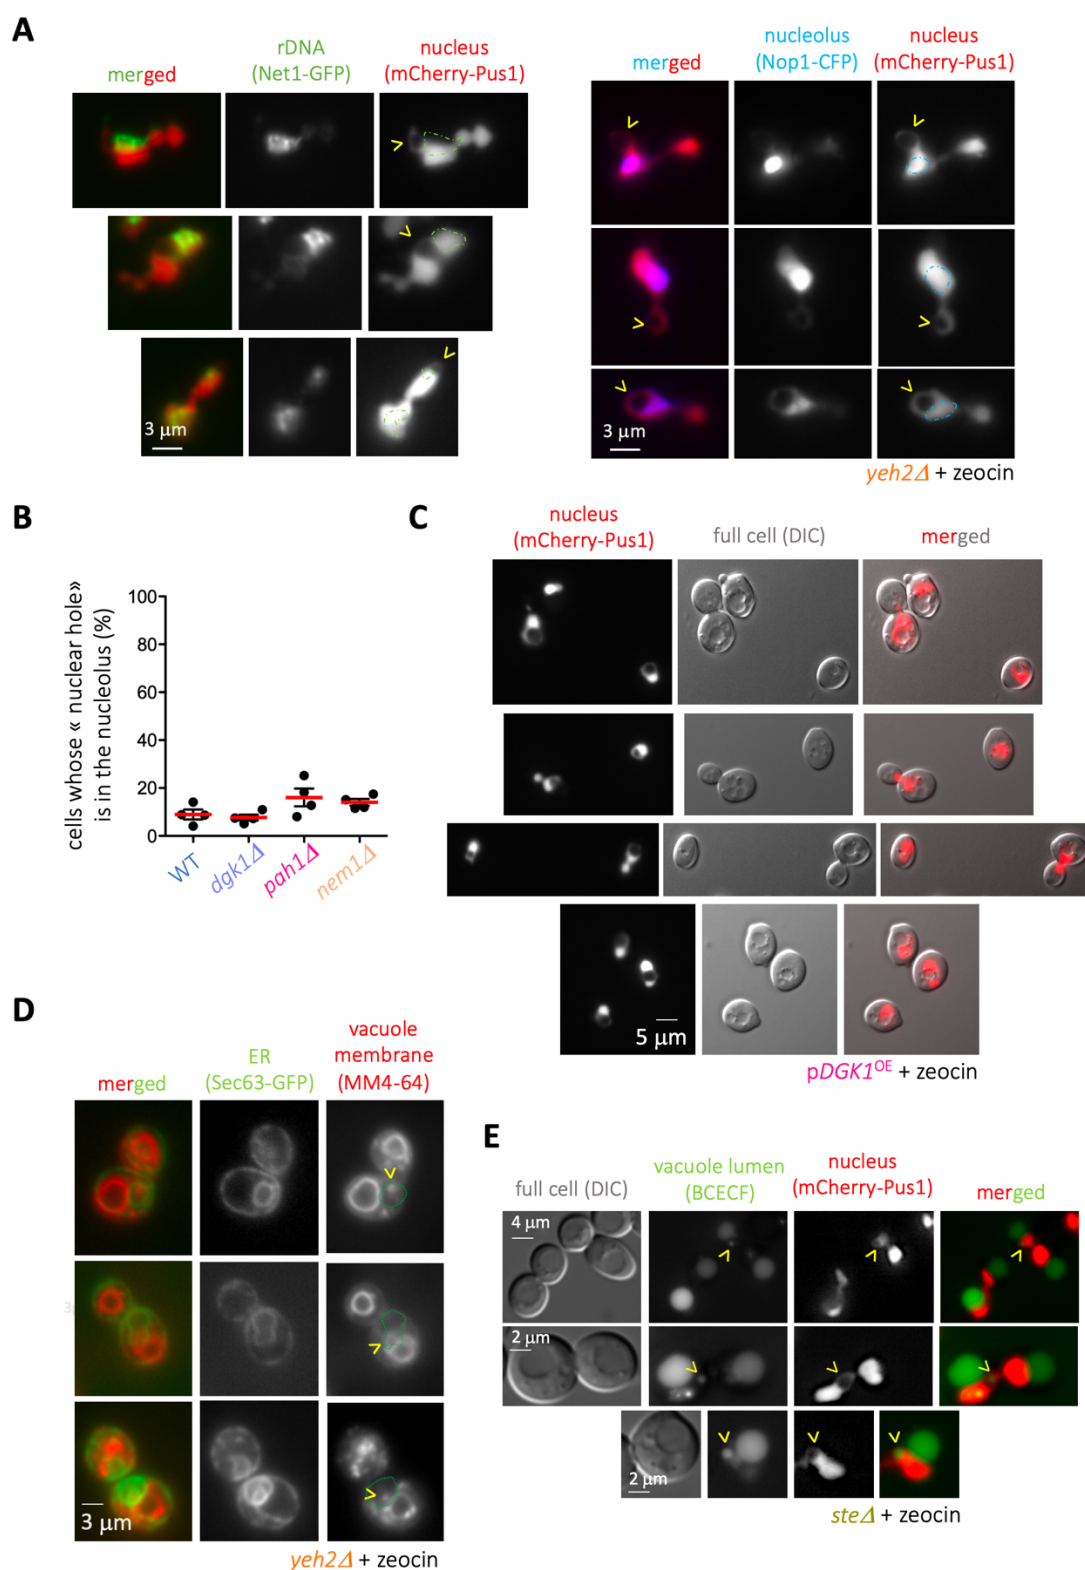

273  
 274  
 275  
 276

**Figure 3. Determination by microscopy of the nature of the nuclear holes**

(A) The strain *yeh2Δ*, which displays nuclear holes at high frequency in response to 100 μg/mL zeocin (Figure 2G), was transformed either with a vector expressing Net1-GFP, to mark the position of the ribosomal DNA, or with a

277 vector expressing Nop1-CFP, to mark the position of the nucleolus, grown to the exponential phase and treated  
278 with that drug. The comparison with nucleoplasmic mCherry-Pus1 signals allows to monitor the relative position  
279 of the nuclear holes with respect to these sub-nuclear domains. To facilitate visualization, the contour of the rDNA  
280 or the nucleolar signals has been over-imposed onto the nucleoplasmic ones.

281 (B) The indicated strains, transformed with the vector expressing Nop1-CFP, were monitored for the relative  
282 position of the nuclear holes with respect to the nucleolus. The percentage of cells in the population in which the  
283 nuclear hole disrupted the nucleolus was counted. The red bar reflects the mean of 4 independent experiments,  
284 and the error bars account for the SEM. At least 200 cells were considered per condition and experiment.

285 (C) Selected examples of cells in which the comparison of the mCherry-Pus1 signals and the position of the  
286 vacuoles, as inferred from the differential interference contrast (DIC) images, permit to infer that the nuclear  
287 holes correspond to the vacuole.

288 (D) The strain *yeh2Δ*, which displays nuclear holes at high frequency in response to 100 μg/mL zeocin (Figure 2G),  
289 was transformed with a vector expressing Sec63-GFP to mark the Endoplasmic Reticulum, which includes the  
290 nuclear membrane. Exponentially growing cells treated with this drug for 210 min were dyed with the vacuole  
291 membrane marker MM4-64 and imaged. The rationale was to try to identify vacuoles inside the nucleus. Apart  
292 from doubtful events due to the focal plane, these events were rare. Three examples in which vacuole-reminiscent  
293 bodies, dyed with MM4-64, could be found inside the nucleus, are shown. To facilitate comparison, the nuclear  
294 contour has been over-imposed onto the MM4-64 channel and pointed at by yellow arrowheads.

295 (E) The strain *steΔ*, which displays mCherry-Pus1-defined nuclear holes at high frequency in response to 100  
296 μg/mL zeocin (Figure 2G), was grown in rich medium to the exponential phase and treated with this drug for 3  
297 hours. Vacuole lumens were dyed using the dye BCECF and cells immediately imaged. Yellow arrowheads point  
298 at nuclear holes dyed with the BCECF marker.

299

## 300 5. Nuclear holes correspond to nucleus-engulfed vacuoles

301 We next aimed at understanding the nature of the nuclear holes. A re-inspection of the  
302 images made it apparent that the black holes corresponded to vacuoles in the DIC channel  
303 (Figure 3C). Importantly, these examples neatly differed from situations where the vacuole is  
304 so big that it pushes, therefore deforms, the nucleus (Figure S2A). By using the vacuole  
305 membrane-specific dye MM4-64, which emits in the red wavelength range, we could validate  
306 that the nuclear holes adjacent to or within the Nop1-CFP signals were vacuoles (Figure S2B).  
307 However, some nuclear black holes that could be inferred adjacent to the Nop1 signal were  
308 partially refractory to MM4-64 staining (Figure S2B, arrowheads). These data suggested that  
309 the membrane of the nucleus-embedded vacuoles may have an altered identity. In support of  
310 this, when we tried to visualize the intra-nuclear vacuoles with MM4-64 and the nuclear  
311 periphery by using the ER marker Sec63-GFP in *yeh2Δ* cells treated with zeocin, we rarely  
312 detected any intranuclear vacuole. Only in isolated instances could we observe MM4-64 marks  
313 evocative of, yet inconclusively, intra-nuclear signals (Figure 3D).

314 To provide more solid proof for the identity of nuclear holes as vacuoles, we further  
315 used a dye marking the vacuolar lumen. To reduce the impact of the possibility that the lumen  
316 of intra-nuclear vacuoles also possesses altered properties, we chose the pH-independent dye

317 BCECF (30). This robust dye allowed us to detect eventual examples where the nuclear hole  
318 was irrefutably filled with BCECF signals (Figure 3E, yellow arrowheads). Yet, in many instances,  
319 the BCECF signals arising from nuclear holes were poor or lacking, again suggesting that the  
320 engulfed vacuoles have altered properties. We conclude that the black holes detected in the  
321 nucleus most probably correspond to vacuoles whose identity is altered.

322

## 323 6. Alterations in autophagy are detected in cells with engulfed vacuoles

324 The vacuole is the central organelle where autophagy takes place. Vacuole  
325 sequestration in the nucleus could therefore alter the efficiency of autophagy. In particular,  
326 we hypothesized that their internalization in the nucleus would prevent them from interacting  
327 with the different cargoes, thus decreasing autophagy efficiency. To monitor this, we used a  
328 broadly accepted tool consisting of the N-terminally GFP-tagged version of the autophagosome  
329 membrane-nucleating factor Atg8 (31,32). GFP-Atg8 molecules become degraded with the  
330 cargo, but the partial resistance to degradation of the GFP moiety permits the assessment of  
331 autophagy completion. This way, degradative vacuoles appear as green when scored by  
332 fluorescence microscopy. Additionally, free GFP molecules, which migrate faster in a protein  
333 gel than the intact GFP-Atg8 ones, can be used to establish the percentage of degradation by  
334 Western blot. We compared the autophagic flux in conditions displaying increasing levels of  
335 nuclear holes (WT < *yeh2Δ* < WT + zeo < *yeh2Δ* + zeo, Figure 2G). We first treated or not WT  
336 and *yeh2Δ* cells with zeocin (zeocin effect was monitored by its ability to elicit the  
337 phosphorylation of the DNA Damage Response effector Rad53 (Figure S2C)), and induced  
338 autophagy 210 min later by adding rapamycin. We observed a striking correlation between  
339 nuclear holes presence and autophagic flux. Yet, to our surprise, it was inverse to our  
340 expectations: the conditions triggering the higher number of cells with nuclear holes were the  
341 ones showing increased autophagic completion, irrespective of whether monitoring was done  
342 by Western blot (Figure 4A, % free GFP moieties) or by counting green vacuoles (Figure 4B).  
343 Thus, scenarios in which nuclear holes are formed match a higher autophagic flux upon  
344 rapamycin induction.

345

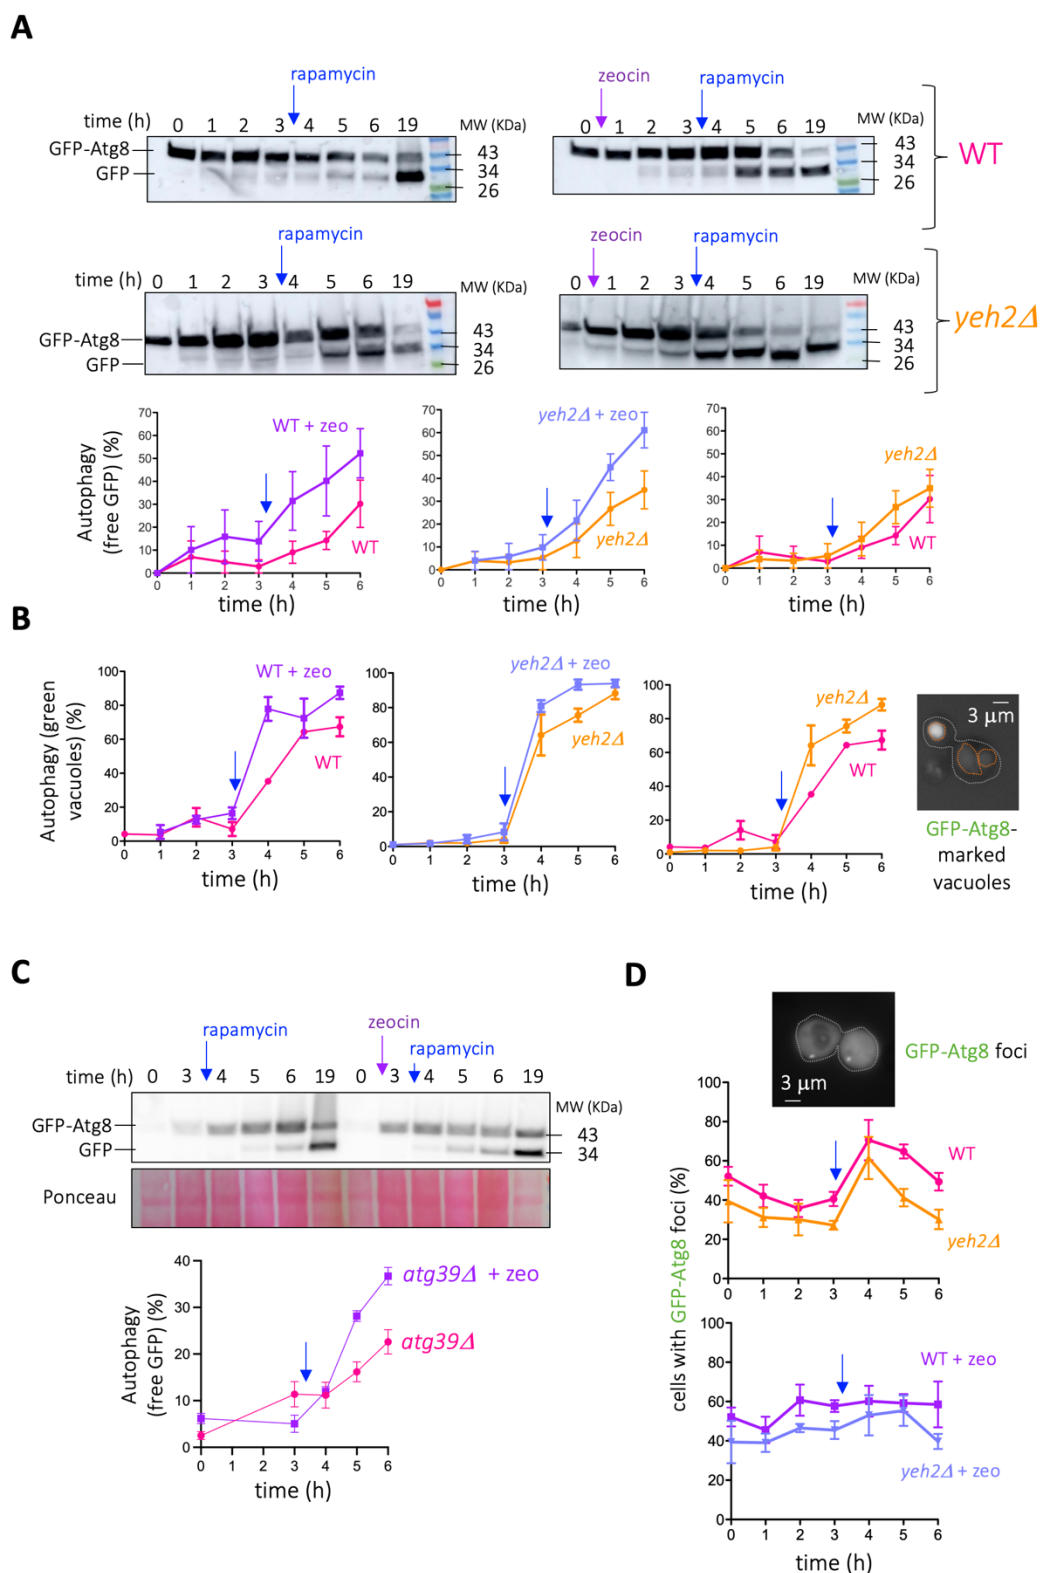

346

347 **Figure 4. Characterization of the relationship between nucleus-internalized vacuoles and autophagy**

348 (A) Cells of the indicated genotype, transformed with a vector expressing GFP-Atg8, were grown to the

349 exponential phase in rich medium and treated as indicated. Notably, 100 μg/mL zeocin was added or not and, 3

350 h later, 200 ng/mL rapamycin was added in all the cases. Samples were retrieved at the indicated time-points.

351 The implementation of autophagy was monitored through Western Blotting against GFP moieties. Time 16h is

352 included to illustrate that cells achieve a comparable level of autophagy. The quantifications plot the percentage

353 of free GFP with respect to all the GFP signal in a given lane. The blue arrow is a reminder of the moment when  
354 rapamycin was added. The plotted points and the error bars are the mean and the SEM, respectively, of 3  
355 independent kinetics.

356 **(B)** The same experiment described in (A) was done and cells were monitored by fluorescence microscopy. In this  
357 case, the level of autophagy was calculated as the percentage of cells in the population displaying green vacuoles,  
358 indicative of autophagy completion. An example of such a cell is displayed on the right, with the cell contour  
359 drawn in white and the vacuole one in orange. The blue arrow is a reminder of the moment when rapamycin was  
360 added. The plotted points and the error bars are the mean and the SEM, respectively, of 3 independent kinetics.

361 **(C)** Details as in (A) but to compare the effect of zeocin treatment (or its absence) when autophagy is induced by  
362 rapamycin in a strain lacking the protein Atg39.

363 **(D)** The same experiments presented in (B) were exploited to count the percentage of cells displaying GFP-Atg8  
364 foci, indicative of growing phagophores and of autophagosomes. An example of a cell displaying two of these foci  
365 is shown, with the cell contour marked with a dashed white line.

366

## 367 **7. Nucleus-internalized vacuoles represent low-efficiency vacuoles that basally tame** 368 **autophagy if in the cytoplasm**

369 We failed to detect nuclear membrane markers (e.g. Sec63-GFP signals) surrounding  
370 internalized vacuoles (Figure 3D). Yet, one could imagine that an increase in nuclear membrane  
371 may accompany the internalization. In that case, a trivial explanation underlying the observed  
372 increase in autophagy would be that the increase in nuclear membranes developed during  
373 vacuole engulfment provides more substrates to be degraded by autophagy. To assess this  
374 possibility, we repeated the monitoring of GFP-Atg8 degradation by comparing the ability in  
375 untreated *versus* zeocin conditions of a strain in which the Atg39 receptor, which instructs the  
376 autophagy of the nuclear membrane (33,34), had been removed. We observed that the  
377 incapacity to execute nuclear membrane autophagy still granted an accelerated autophagy  
378 completion when plus zeocin (Figure 4C). Thus, the enhanced autophagy execution seen in  
379 contexts where vacuoles are internalized in the nucleus does not stem from an excess of  
380 nuclear membrane-derived cargoes.

381 Still, the increase in general autophagy completion could be arguably explained by an  
382 increase in the number of cargoes to be degraded other than from the nuclear membrane. To  
383 assess this, we counted the number of cells displaying GFP-Atg8 foci, which represent the  
384 incipient phagophores and the growing and mature autophagosomes prior to their fusion to  
385 and destruction within the vacuole. This way, one would expect more foci in *yeh2Δ* than in WT  
386 cells if there were more cargoes to be degraded, while one would expect less foci in *yeh2Δ*  
387 than in WT cells if the increased autophagy completion was due to more efficient  
388 autophagosome clearance. Both when zeocin was added and when not, *yeh2Δ* cells recurrently  
389 displayed less GFP-Atg8 foci than WT cells (Figure 4D). Altogether, we conclude that the  
390 frequency with which the nucleus internalizes vacuoles matches an improvement in the ability



391 of executing autophagy upon rapamycin addition. In this context, we propose that engulfed  
392 vacuoles may represent entities with low autophagy efficiency whose internalization within the  
393 nucleus would help cytoplasmic cargoes increase their chances of encountering only the  
394 proficient ones (Figure 5).  
395

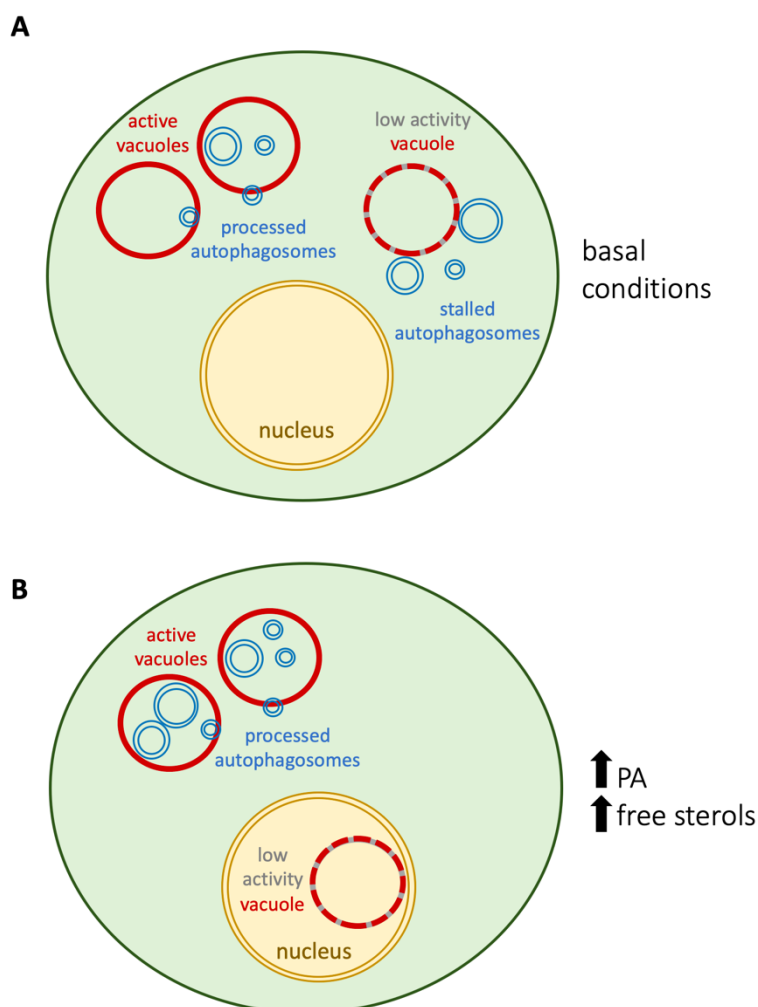

396  
397 **Figure 5. Proposed model to account for the improvement in autophagy in vacuole-engulfed contexts**  
398 (A) We propose that, basally, vacuoles with low autophagic potential may exist in the cytoplasm. Docking of  
399 autophagosome with such vacuoles does not culminate with autophagy execution yet delays these  
400 autophagosomes from delivering their content to a fully proficient vacuole.

401 (B) When low autophagic potential vacuoles are internalized in the nucleus, for example in PA- or sterols-rich  
402 membrane scenarios, their clearance from the cytoplasm indirectly contributes to the more frequent encounter  
403 between proficient vacuoles and autophagosomes, therefore permitting an optimization of the autophagic flux.

404

#### 405 Discussion

406 In this work, we have identified a striking phenomenon through which the vacuole  
407 appears internalized in the nucleus. This process necessitates the accumulation of  
408 Phosphatidic Acid at the inner nuclear membrane and can be further fostered by high levels of



409 free sterols. While its specific drivers and the detailed underlying process remain to be  
410 assessed in more depth, we uncover its impact on the efficiency of autophagy.  
411 Counterintuitively, sequestration of vacuoles in the nucleus matches an improved capacity for  
412 autophagy, presumably because low-efficiency vacuoles are the ones being internalized. Thus,  
413 we have uncovered a dramatic membrane-remodeling event with an immediate impact on  
414 metabolic adaptation.

415 We have serendipitously identified two situations in which, upon treatment of cells with  
416 two genotoxic agents, the phenomenon of vacuole internalization within the nucleus could be  
417 detected. It is hard to establish a common feature that can explain this, since zeocin and MMS,  
418 the two triggering agents, do not create DNA damage in the same way. In this sense, zeocin  
419 provokes single and double DNA breaks, while MMS mostly alkylates DNA bases and therefore  
420 limits the use of DNA as a template. Further, other genotoxins do not elicit the phenomenon  
421 under study (Figure 1B, 1SB). Thus, we think we can safely say that the phenomenon is not  
422 related to DNA damage itself. The explanation could be temptingly related to the cell cycle  
423 phase, since zeocin forces cells to arrest in G2 (Figure 1C) and nocodazole, an agent forcing  
424 cells to accumulate in the G2-to-M transition, also firmly elicits the phenotype (Figure 1D). That  
425 said, not all the treatments that lead cells to stall their progression at this cell cycle stage induce  
426 the formation of nuclear holes (Figure 1B,C). We purport that all the eliciting agents may entail  
427 a stress provoking changes in the metabolism of lipids. In support, zeocin was reported to  
428 trigger membrane expansion (23) and a recent work reports on methylglyoxal inducing a lipid-  
429 driven nuclear deformation after vacuolar pushing (35).

430 The mechanism through which vacuole ingress occurs also remains unassessed, but  
431 we define the need for a raise in the level of PA or sterols. Given the negative curvature-  
432 imparting potential of these lipids, in a first scenario the nuclear membrane would be  
433 plastically deformed towards the nucleoplasm to permit the vacuole entry. Resealing of the  
434 nuclear membranes behind the vacuole would sequester it without necessarily hosting it  
435 within the nucleoplasm. This option is unlikely because we failed to find intra-nuclear Sec63-  
436 GFP signals surrounding the vacuoles. Alternatively, the nuclear membrane may transiently  
437 break and reseal to permit a true engulfment. Yet, PA is also known as a fusogenic lipid (36),  
438 and the altered identity of the vacuole membrane once inside the nucleus (Figure 3D) is  
439 evocative of a vacuolar-nuclear membranes fusion event. Both sterols and PA have been  
440 defined as modulators of vacuolar membranes fusion (37,38), thus this scenario is also  
441 plausible. Whichever the case, the process will imply a deep remodeling of the contacts  
442 between the nuclear and vacuolar membranes. It is therefore possible that proteins implicated  
443 in vacuole-nucleus membranes hyper-tethering, such as Nvj1, Mdm1 and Snd3, are important

444 players (5,8,9,15). Their study will be a key entry point to dissect the mechanism of vacuole  
445 ingress in the future.

446 The intrusion in the nucleoplasmic space of a voluminous body, such as a vacuole, is  
447 akin to alter nuclear processes. In a passive manner, just because of the space it occupies, it is  
448 likely to disrupt chromosome territories and displace, literally pushing, chromatin. Pushed  
449 chromatin behaves as condensed or compacted, and as such will emit related signals (39),  
450 impacting DNA transactions as transcription or repair. Furthermore, the presence of a  
451 membrane-enclosed body in the middle of the nucleus represents an unscheduled source of  
452 additional anchorage. Since multiple genome-related mechanisms, including coordination of  
453 transcription with replication, DNA damage sensing and repair, and telomere homeostasis  
454 request the nuclear membrane for structuration (40–46), the sudden presence of this novel  
455 substrate may interfere, for good or for bad, with these processes.

456 Our discovery of an increased ability for efficient autophagy under set-ups where some  
457 vacuoles were internalized in the nucleus raised the notion that vacuoles with low autophagic  
458 potential could be “selectively” excluded from the cytoplasm in this way (Figure 4). We suggest  
459 that this process may optimize the encounter of autophagosomes only with performant  
460 vacuoles, thus fostering the autophagic flux, quality control-wise (Figure 5, model). This model  
461 invokes a means for detecting the vacuoles whose autophagic potential is low. It is plausible  
462 that such vacuoles have an altered membrane composition that renders them susceptible of  
463 interaction with, and internalization within, the nucleus (Figure 5, discontinuous vacuole  
464 membrane). Our model also raises the question of whether this process could become “useful”  
465 and, as such, exploited by the cell under given circumstances. For example, the fact that the  
466 autophagy rate seen in the WT strain can be further improved by increasing sterols in  
467 membranes (Figure 4A,B, *yeh2Δ vs WT*) suggests that autophagy is basally “dampened” in the  
468 WT strain. Whether this window for autophagic capacity improvement is valuable under some  
469 circumstances remains to be explored. One of the set-ups where vacuole internalization within  
470 the nucleus was maximal corresponded to the absence of the phosphatase Nem1 (Figure 2C).  
471 In apparent contradiction with our proposal, absence of Nem1 hampers autophagy (47,48).  
472 We reconcile both findings claiming that, in the absence of Nem1, the internalization is so  
473 dramatic that it no further discriminates the type of vacuole, an extreme case in which the  
474 overall effect on autophagy will be negative.

475 Another aspect worth discussing is the potential conservation of this phenomenon. The  
476 vacuole fulfills in *S. cerevisiae* the function the lysosomes accomplish in most animal and  
477 vegetal cells. In these cells, a strikingly reminiscent process regarding the proximity of  
478 lysosomes with the nucleus dictates the cell’s ability to complete autophagy. Indeed, while  
479 autophagosomes form randomly at different locations within the cytoplasm, active lysosomes

480 reside at the perinuclear region, and microtubule-dependent transport of autophagosomes  
481 towards the nuclear periphery needs to occur for fusion and subsequent autophagy (49). Of  
482 note, low cholesterol at membranes prevents this transport, therefore decreasing autophagy  
483 execution (50). Together, a common picture emerges in which, the higher the proximity with  
484 the nucleus (in the case of yeast being extreme, for it can be “inside”), the higher the overall  
485 efficiency in autophagy, and in both cases improved by high levels of free cholesterol in  
486 membranes. Indeed, lysosome positioning affects its acidity and therefore its autophagic  
487 potential (51–53), another aspect we also evoked during this work. In further (striking) analogy,  
488 a very recent work reports the accumulation of non-functional lysosomes within nuclear holes  
489 in late stages of the cell cycle in human cells (54). Last, the proximity of lysosomes to the  
490 nucleus is said to favor the faster delivery of transcription factors that reside onto lysosomes  
491 in order to trigger adaptive transcriptional programs in view of nutritional and metabolic  
492 changes (55). We note that hosting the vacuole literally inside the nucleus is the most radical  
493 way of bringing its coating transcription factors in proximity to their target DNA. It would be  
494 worth exploring whether we have uncovered, through this mechanism, a novel strategy for  
495 transcriptional regulation.

496

## 497 **Materials and Methods**

498 **Cell culture and treatments:** *Saccharomyces cerevisiae* cells were grown at 25°C in YEP (rich) or  
499 yeast nitrogen base (YNB) (minimal) liquid medium supplemented with 2% glucose (dextrose),  
500 unless otherwise indicated. Transformed cells were selected for plasmid maintenance in YNB–  
501 leucine or YNB–uracil medium overnight. The morning after, the exponentially growing  
502 cultures were diluted and grown for at least 4 hours in rich medium to create the optimal  
503 conditions to induce the formation of the “nuclear holes”, unless otherwise indicated. To  
504 induce the overexpression of *DGK1* and *PAH1-7A*, cells were grown overnight in YNB–leucine  
505 with 2% glycerol. Then, 2% galactose was added to exponentially growing cultures to induce  
506 their expression. The strains and the plasmids used in this study are referred to in [Table 1](#) and  
507 [Table 2](#), respectively.

508

509 **Reagents:** 4-NQO (N8141, Sigma-Aldrich), rapamycin (HY-10219, Cliniscience), MM4-64 (SC-  
510 477259, Santa Cruz Biotechnology), BCECF (216254, Sigma-Aldrich), methylmetanosulfonate  
511 (MMS, 129925, Sigma-Aldrich), zeocin (R25001, ThermoFisher), Nocodazole (M1404, Sigma-  
512 Aldrich), Hydroxyurea (HU, H8627, Sigma-Aldrich), Camptothecin (CPT, C9911, Sigma-Aldrich).

513

514 **Table 1.** Strains used in this study

| Simplified Genotype                               | Full Genotype                                                                                                        | Source                                                                     |
|---------------------------------------------------|----------------------------------------------------------------------------------------------------------------------|----------------------------------------------------------------------------|
| WT (background BY)                                | <i>MAT<sub>a</sub>, his3Δ1, leu2Δ0, met15Δ0, ura3Δ0</i>                                                              | EUROSCARF                                                                  |
| <i>yeh2Δ</i> (background BY)                      | <i>MAT<sub>a</sub>, his3Δ1, leu2Δ0, met15Δ0, ura3Δ0, yeh2ΔG418<sup>R</sup></i>                                       | Zvulum Elazar                                                              |
| Net1-GFP mCherry-Pus1 (background BY)             | <i>MAT<sub>a</sub>, his3Δ1, leu2Δ0, met15Δ0, ura3Δ0, yeh2ΔG418<sup>R</sup><br/>NET1-GFP-LEU2, mCherry-PUS1::URA3</i> | MM-198, this study                                                         |
| Rad52-YFP Rfa1-CFP mCherry-Pus1 (background W303) | <i>MAT<sub>a</sub>, ade2, his3, can1, leu2, trp1, ura3,<br/>RAD52-YFP RFA1-CFP mCherry-PUS1::URA3</i>                | PP3558,<br>Philippe Pasero                                                 |
| yEGFP-Tel1 mCherry-Pus1 (background W303)         | <i>MAT<sub>a</sub>, ade2, his3, can1, leu2, trp1, ura3, GAL+, psi+, RAD5+,<br/>yEGFP-TEL1, mCherry-PUS1::URA3</i>    | MM-40                                                                      |
| <i>atg39Δ</i> (background W303)                   | <i>MAT<sub>a</sub>, ade2, his3, can1, leu2, trp1, ura3, GAL+, psi+, RAD5+,<br/>atg39ΔG418<sup>R</sup></i>            | MM-37, this study                                                          |
| <i>are1Δ are2Δ (steΔ)</i> (background W303)       | <i>MAT<sub>alpha</sub>, ade2, his3, can1, leu2, trp1, ura3, are1ΔHIS3<br/>are2ΔLEU2</i>                              | Zvulum Elazar                                                              |
| WT (background RS453)                             | <i>MAT<sup>?</sup>, ade2-1, his3-11,15, leu2-3,112, trp1-1, ura3-52</i>                                              | SS2236, Symeon Siniosoglou                                                 |
| <i>dgk1Δ</i> (background RS453)                   | <i>MAT<sup>?</sup>, ade2-1, his3-11,15, leu2-3,112, trp1-1, ura3-52, dgk1Δ</i>                                       | SS1144, Symeon Siniosoglou                                                 |
| <i>pah1Δ</i> (background RS453)                   | <i>MAT<sup>?</sup>, ade2-1, his3-11,15, leu2-3,112, trp1-1, ura3-52,<br/>pah1Δ + pPAH1-URA3</i>                      | SS1746, Symeon Siniosoglou<br>(cured from pPAH1-URA3 prior to experiments) |
| <i>nem1Δ</i> (background RS453)                   | <i>MAT<sup>?</sup>, ade2-1, his3-11,15, leu2-3,112, trp1-1, ura3-52, nem1Δ</i>                                       | SS1960, Symeon Siniosoglou                                                 |

515

516 **Table 2.** Plasmids used in this study

| Simplified Name | Detailed Information                                                                                                | Source                  |
|-----------------|---------------------------------------------------------------------------------------------------------------------|-------------------------|
| pEmpty (-ura)   | pRS316                                                                                                              | Benjamin Pardo          |
| pEmpty (-leu)   | YEplac181                                                                                                           | Symeon Siniosoglou (16) |
| pDGK1           | YEplac181-GAL1/10p-DGK1                                                                                             | Symeon Siniosoglou (17) |
| pPAH1-7A        | YEplac181-GAL1/10p-PAH1-7A                                                                                          | Symeon Siniosoglou (16) |
| pSEC63-GFP      | pJK59(CEN-URA3-SEC63p-SEC63-GFP(S65T,V163A))                                                                        | Sebastian Schuck (18)   |
| pNOP1-CFP       | pNOP1-CFP::LEU2                                                                                                     | Danesh Moazed (19)      |
| pNET1-GFP       | pDM266 (pNET1-GFP-LEU2) non-centromeric,<br>digested with BglII allows integration within the endogenous NET1 locus | Félix Machín (20)       |
| pNLS-Q2-mCherry | pRS316-CYC1p-Nup60 <sup>1-24</sup> (NLS)-Opi1 <sup>Q2</sup> -mCherry-NUP1t                                          | Alwin Köhler (21)       |
| pGFP-Atg8       | pGFP-ATG8-URA3                                                                                                      | Wei-Pang Huang (22)     |

517

518 **Cytometry:** 430 μL of culture samples at 10<sup>7</sup> cells/mL were fixed with 1 mL of 100% ethanol.

519 Cells were centrifuged for 1 minute at 16000g and resuspended in 500 μL 50 mM Na-Citrate

520 buffer containing 5 μL of RNase A (10 mg/mL, Euromedex, RBO474) for 2 hours at 50°C. 6 μL of

521 Proteinase K (Euromedex, EU0090-C) were added for 1 hour at 50°C. Aggregates of cells were  
522 dissociated by sonication (one 3 s-pulse at 50% potency in a Vibracell 72405 Sonicator). 20 µL  
523 of this cell suspension were incubated with 200 µL of 50 mM Na-Citrate buffer containing 4  
524 µg/mL Propidium Iodide (FisherScientific). Data were acquired and analyzed on a Novocyte  
525 Express (Novocyte).

526

527 **Protein Extraction & Western blot:** Approximately  $5 \times 10^8$  cells were collected at each relevant  
528 time point and washed with 20% trichloroacetic acid to prevent proteolysis, then resuspended  
529 in 200 µL of 20 % trichloroacetic acid at 4°C. The same volume of glass beads was added, and  
530 cells were disrupted by vortexing for 10 min. The resulting extract was spun for 10 min at 1000  
531 g also at room temperature and the resulting pellet resuspended in 200 µL of 2x Laemmli  
532 buffer. Whenever the resulting extract was yellow-colored, the minimum necessary volume of  
533 1 M Tris base (non-corrected pH) was added till blue color was restored. Then, water was  
534 added till reaching a final volume of 300 µL. These extracts were boiled for 10 min and clarified  
535 by centrifugation as before. To separate Rad53 isoforms, 10–15 µL of this supernatant was  
536 loaded onto a commercial 3–8% acrylamide gradient gel (BioRad) and migrated 70 min at 150  
537 V in 1x Tris-Acetate buffer. The same volume of supernatant was used to separate GFP from  
538 GFP-Atg8 isoforms onto a commercial 4–20% acrylamide gradient gel (BioRad) and migrated  
539 45 min at 100 V in 1x MES buffer. Proteins were transferred to a nitrocellulose membrane.  
540 Detection by immunoblotting was accomplished with anti-Rad53 antibody (1/3000), a kind gift  
541 from Dr. C. Santocanale, Galway, Ireland; or anti-GFP antibody (TP-401, Clinisciences, 1/2000),  
542 respectively, and in both cases an anti-rabbit HRP secondary antibody (A9044-2ML, Merck,  
543 1/3000).

544

545 **Microscopy:** 1 mL of the culture of interest was centrifuged; then, the supernatant was thrown  
546 away and the pellet was resuspended in the remaining 50 µL. Next, 3 µL of this cell suspension  
547 was directly mounted on a coverslip for immediate imaging of the pertinent fluorophore-  
548 tagged protein signals. To dye vacuole membranes, 2 µL of a 4 mM MM4-64 stock were added  
549 to 1 mL of culture under incubation 30 min before visualization. To dye vacuole lumens, BCECF  
550 was added to and mixed with the the 50 µL of centrifuged pellet with residual medium at a 50  
551 µM final concentration immediately prior to mounting. Imaging was achieved using a Zeiss  
552 Axioimager Z2 microscope and visualization, co-localization, and inspection performed with  
553 Image J.

554

555 **Quantification of Western blots:** Image J was used to determine the pixel intensity values  
556 associated with the two bands (GFP-Atg8 and GFP) present in each lane. The percentage of

557 autophagy was calculated by dividing the signal associated to free GFP divided the total signal  
558 measured in the lane, multiplied by 100.

559

560 **Quantification of Images:** the determination of the percentage of cells in the population  
561 displaying nuclear holes was done by visual counting by the experimenter. Three independent  
562 experimenters participated in this counting as to warrant reproducibility and reliability.

563

564 **Graphical representations and Statistical analyses** were made with GraphPad Prism to both  
565 plot graphs and statistically analyze the data. For data representation, the SEM (standard error  
566 of the mean) was used. The SEM estimates how far the calculated mean is from the real mean  
567 of the sample population, while the SD (standard deviation) informs about the dispersion  
568 (variability) of the individual values constituting the population from which the mean was  
569 drawn. Since all the measurements we were considering for each individual experiment  
570 concerned a mean (the percentage of cells in the population presenting nuclear “holes”), and  
571 the goal of our error bars was to describe the uncertainty of the true population mean being  
572 represented by the sample mean, we did the choice of plotting the SEM.

573

#### 574 **Acknowledgements**

575 We are very thankful to Sebastian Schuck for the gift of pSec63-GFP, to Symeon  
576 Siniosoglou for the plasmid allowing mCherry-Pus1 tagging, the vectors to overexpress Dgk1  
577 and Pah1-7A, and the *dgk1Δ*, *nem1Δ* and *pah1Δ* strains, and to Zvulum Elazar for *steΔ* and  
578 *yeh2Δ* strains. We also thank Alwin Köhler for pNLS-Q2-mCherry, Félix Machín for pNet1-GFP,  
579 Danesh Moazed for pNop1-CFP, Alba Torán-Vilarrubias for creating the *atg39Δ* strain, Corrado  
580 Santocanale for the kind gift of anti-Rad53 antibody, Pr. Wei-Pang Huang for the present of  
581 pGFP-Atg8, and Philippe Pasero and Benjamin Pardo for the Rad52-YFP Rfa1-CFP strain and  
582 pRS316, respectively. We are indebted to Simonetta Piatti, Lucile Espert and Félix Machín for  
583 critical reading of the manuscript and helpful insights to improve this work. We also  
584 acknowledge the imaging facility MRI, a member of the national infrastructure France-  
585 Biolmaging, supported by the French National Research Agency (ANR-10- INBS-04,  
586 Investissements d’avenir). We finally thank the ATIP-Avenir program, La Ligue contre le Cancer  
587 et l’Institut National du Cancer (PLBIO19-098 INCA\_13832), France, for funding our research.

588

#### 589 **Author contributions**

590 Conceptualization, M.G., S.K., A. E.-V. and M.M.-C.; Data curation, S.K., A. E.-V. and  
591 M.M.-C.; Formal analysis, M.G., S.K., A. E.-V., C. S. and M.M.-C.; Methodology, M.G., S.K. and  
592 M.M.-C.; Investigation, M.G., S.K. and M.M.-C.; Writing—original Draft, M.M.-C.; Writing—

593 Review and Editing, M.G., S.K., A. E.-V., C.S. and M.M.-C.; Funding Acquisition, M.M.-C.;  
594 Supervision, M.M.-C. Project administration, M.M.-C.

595

## 596 Declaration of interests

597 The authors declare no competing interests.

598

## 599 Abbreviations

600 BCECF, 2',7'-Bis-(2-Carboxyethyl)-5-(and-6)-Carboxyfluorescein Acetoxymethyl  
601 Ester; CFP, cyan fluorescent protein; CPT, camptothecin; DAG, diacylglycerol; DIC, differential  
602 interference contrast; GFP, green fluorescent protein; HU, hydroxyurea; INM, inner nuclear  
603 membrane; MMS, methylmethanesulfonate; NVJ, nucleus-vacuole junction; PA, phosphatidic  
604 acid; SEM, standard error of the mean; WT, wild type; 4-NQO, 4-nitroquinoline 1-oxide.

605

## 606 References

- 607 1. Ron D, Walter P. Signal integration in the endoplasmic reticulum unfolded protein response. *Nat*  
608 *Rev Mol Cell Biol.* 2007;8(7):519–29.
- 609 2. Zhang D, Oliferenko S. Remodeling the nuclear membrane during closed mitosis. *Curr Opin Cell*  
610 *Biol [Internet].* 2013;25(1):142–8. Available from: <http://dx.doi.org/10.1016/j.ceb.2012.09.001>
- 611 3. Ungricht R, Kutay U. Mechanisms and functions of nuclear envelope remodelling. *Nat Rev Mol*  
612 *Cell Biol.* 2017;18(4):229–45.
- 613 4. Scorrano L, De Matteis MA, Emr S, Giordano F, Hajnóczky G, Kornmann B, et al. Coming together  
614 to define membrane contact sites. *Nat Commun [Internet].* 2019;10(1):1–11. Available from:  
615 <http://dx.doi.org/10.1038/s41467-019-09253-3>
- 616 5. Rogers SM, Hariri H, Wood NEM, Speer NO, Henne WM. Glucose restriction drives spatial  
617 reorganization of mevalonate metabolism. *Elife.* 2021;10:1–23.
- 618 6. Lahiri S, Toulmay A, Prinz WA. Membrane contact sites, gateways for lipid homeostasis. *Curr*  
619 *Opin Cell Biol [Internet].* 2015;33:82–7. Available from:  
620 <http://dx.doi.org/10.1016/j.ceb.2014.12.004>
- 621 7. Pan X, Roberts P, Chen Y, Kvam E, Shulga N, Huang K, et al. Nucleus-vacuole junctions in  
622 *Saccharomyces cerevisiae* are formed through the direct interaction of Vac8p with Nvj1p. *Mol*  
623 *Biol Cell.* 2000;
- 624 8. Tosal-Castano S, Peselj C, Kohler V, Habernig L, Berglund LL, Ebrahimi M, et al. Snd3 controls  
625 nucleus-vacuole junctions in response to glucose signaling. *Cell Rep.* 2021;34(3).
- 626 9. Hariri H, Rogers S, Ugrankar R, Liu YL, Feathers JR, Henne WM. Lipid droplet biogenesis is  
627 spatially coordinated at ER –vacuole contacts under nutritional stress . *EMBO Rep.*  
628 2018;19(1):57–72.
- 629 10. Kvam E, Goldfarb DS. Nucleus-vacuole junctions and piecemeal microautophagy of the nucleus  
630 in *S. cerevisiae*. *Autophagy.* 2007;3(2):85–92.



- 631 11. Mostofa MG, Morshed S, Shibata R, Takeichi Y, Rahman MA, Hosoyamada S, et al. rDNA  
632 Condensation Promotes rDNA Separation from Nucleolar Proteins Degraded for Nucleophagy  
633 after TORC1 Inactivation. *Cell Rep* [Internet]. 2019;28(13):3423-3434.e2. Available from:  
634 <https://doi.org/10.1016/j.celrep.2019.08.059>
- 635 12. Golam Mostofa M, Rahman MA, Koike N, Yeasmin AMST, Islam N, Waliullah TM, et al. CLIP and  
636 cohibin separate rDNA from nucleolar proteins destined for degradation by nucleophagy. *J Cell*  
637 *Biol*. 2018;217(8):2675–90.
- 638 13. Lord CL, Wente SR. Nuclear envelope-vacuole contacts mitigate nuclear pore complex assembly  
639 stress. *J Cell Biol*. 2020;
- 640 14. Kvam E, Goldfarb DS. Nucleus-vacuole junctions in yeast: Anatomy of a membrane contact site.  
641 *Biochem Soc Trans*. 2006;34(3):340–2.
- 642 15. Henne WM, Zhu L, Balogi Z, Stefan C, Pleiss JA, Emr SD. Mdm1/Snx13 is a novel ER-  
643 endolysosomal interorganelle tethering protein. *J Cell Biol*. 2015;210(4):541–51.
- 644 16. O’Hara L, Han GS, Sew PC, Grimsey N, Carman GM, Siniosoglou S. Control of phospholipid  
645 synthesis by phosphorylation of the yeast lipin Pah1p/Smp2p Mg<sup>2+</sup>-dependent phosphatidate  
646 phosphatase. *J Biol Chem*. 2006;281(45):34537–48.
- 647 17. Karanasios E, Barbosa AD, Sembongi H, Mari M, Han GS, Reggiori F, et al. Regulation of lipid  
648 droplet and membrane biogenesis by the acidic tail of the phosphatidate phosphatase Pah1p.  
649 *Mol Biol Cell*. 2013;
- 650 18. Prinz WA, Grzyb L, Veenhuis M, Kahana JA, Silver PA, Rapoport TA. Mutants affecting the  
651 structure of the cortical endoplasmic reticulum in *Saccharomyces cerevisiae*. *J Cell Biol*.  
652 2000;150(3):461–74.
- 653 19. Mekhail K, Seebacher J, Gygi SP, Moazed D. Role for perinuclear chromosome tethering in  
654 maintenance of genome stability. *Nature*. 2008;
- 655 20. Matos-Perdomo E, Machín F. The ribosomal DNA metaphase loop of *Saccharomyces cerevisiae*  
656 gets condensed upon heat stress in a Cdc14-independent TORC1-dependent manner. *Cell Cycle*.  
657 2018;17(2):200–15.
- 658 21. Romanauska A, Köhler A. The Inner Nuclear Membrane Is a Metabolically Active Territory that  
659 Generates Nuclear Lipid Droplets. *Cell*. 2018;
- 660 22. Wang SH, Lin PY, Chiu YC, Huang JS, Kuo YT, Wu JC, et al. Curcumin-mediated HDAC inhibition  
661 suppresses the DNA damage response and contributes to increased DNA damage sensitivity.  
662 *PLoS One*. 2015;10(7):1–19.
- 663 23. Witkin KL, Chong Y, Shao S, Webster MT, Lahiri S, Walters AD, et al. The budding yeast nuclear  
664 envelope adjacent to the nucleolus serves as a membrane sink during mitotic delay. *Curr Biol*.  
665 2012;
- 666 24. Choudhary V, Golani G, Joshi AS, Cottier S, Schneiter R, Prinz WA, et al. Architecture of Lipid  
667 Droplets in Endoplasmic Reticulum Is Determined by Phospholipid Intrinsic Curvature. *Curr Biol*.  
668 2018;
- 669 25. Ben M’barek K, Ajjaji D, Chorlay A, Vanni S, Forêt L, Thiam AR. ER Membrane Phospholipids and  
670 Surface Tension Control Cellular Lipid Droplet Formation. *Dev Cell*. 2017;

- 671 26. Müllner H, Deutsch G, Leitner E, Ingolic E, Daum G. YEH2/YLR020c encodes a novel steryl ester  
672 hydrolase of the yeast *Saccharomyces cerevisiae*. *J Biol Chem*. 2005;
- 673 27. Campbell JL, Lorenz A, Witkin KL, Hays T, Loidl J, Cohen-Fix O. Yeast nuclear envelope  
674 subdomains with distinct abilities to resist membrane expansion. *Mol Biol Cell*. 2006;
- 675 28. Walters AD, Amoateng K, Wang R, Chen JH, McDermott G, Larabell CA, et al. Nuclear envelope  
676 expansion in budding yeast is independent of cell growth and does not determine nuclear  
677 volume. *Mol Biol Cell*. 2019;30(1):131–45.
- 678 29. Barbosa AD, Lim K, Mari M, Edgar JR, Gal L, Sterk P, et al. Compartmentalized Synthesis of  
679 Triacylglycerol at the Inner Nuclear Membrane Regulates Nuclear Organization. *Dev Cell*  
680 [Internet]. 2019;50(6):755-766.e6. Available from:  
681 <https://doi.org/10.1016/j.devcel.2019.07.009>
- 682 30. Plant PJ, Manolson MF, Grinstein S, Demarex N. Alternative mechanisms of vacuolar  
683 acidification in H<sup>+</sup>-ATPase-deficient yeast. *J Biol Chem*. 1999;274(52):37270–9.
- 684 31. Nair U, Thumm M, Klionsky DJ, Krick R. GFP-Atg8 protease protection as a tool to monitor  
685 autophagosome biogenesis. *Autophagy*. 2011;7(12):1546–50.
- 686 32. Geng J, Baba M, Nair U, Klionsky DJ. Quantitative analysis of autophagy-related protein  
687 stoichiometry by fluorescence microscopy. *J Cell Biol*. 2008;182(1):129–40.
- 688 33. Mochida K, Oikawa Y, Kimura Y, Kirisako H, Hirano H, Ohsumi Y, et al. Receptor-mediated  
689 selective autophagy degrades the endoplasmic reticulum and the nucleus. *Nature*.  
690 2015;522(7556):359–62.
- 691 34. Otto FB, Thumm M. Mechanistic dissection of macro- and micronucleophagy. *Autophagy*.  
692 2021;17(3):626–39.
- 693 35. Nomura W, Aoki M, Inoue Y. Methylglyoxal inhibits nuclear division through alterations in  
694 vacuolar morphology and accumulation of Atg18 on the vacuolar membrane in *Saccharomyces*  
695 *cerevisiae*. *Sci Rep* [Internet]. 2020;10(1):1–13. Available from: <https://doi.org/10.1038/s41598-020-70802-8>
- 696
- 697 36. Zhukovsky MA, Filograna A, Luini A, Corda D, Valente C. Phosphatidic acid in membrane  
698 rearrangements. *FEBS Lett*. 2019;593(17):2428–51.
- 699 37. Kato M, Wickner W. Ergosterol is required for the Sec18/ATP-dependent priming step of  
700 homotypic vacuole fusion. *EMBO J*. 2001;20(15):4035–40.
- 701 38. Miner GE, Starr ML, Hurst LR, Fratti RA. Deleting the DAG kinase Dgk1 augments yeast vacuole  
702 fusion through increased Ypt7 activity and altered membrane fluidity. *Traffic*. 2017;18(5):315–  
703 29.
- 704 39. Burgess RC, Burman B, Kruhlak MJ, Misteli T. Activation of DNA Damage Response Signaling by  
705 Condensed Chromatin. *Cell Rep*. 2014;
- 706 40. Bermejo R, Capra T, Jossen R, Colosio A, Frattini C, Carotenuto W, et al. The replication  
707 checkpoint protects fork stability by releasing transcribed genes from nuclear pores. *Cell*. 2011;
- 708 41. Towbin BD, Meister P, Gasser SM. The nuclear envelope - a scaffold for silencing? *Current*  
709 *Opinion in Genetics and Development*. 2009.
- 710 42. Rothballer A, Kutay U. The diverse functional LINC of the nuclear envelope to the cytoskeleton

- 711 and chromatin. *Chromosoma*. 2013.
- 712 43. Mekhail K, Moazed D. The nuclear envelope in genome organization, expression and stability.  
713 *Nature Reviews Molecular Cell Biology*. 2010.
- 714 44. Lei K, Zhu X, Xu R, Shao C, Xu T, Zhuang Y, et al. Inner nuclear envelope proteins SUN1 and SUN2  
715 play a prominent role in the DNA damage response. *Curr Biol*. 2012;
- 716 45. Oza P, Jaspersen SL, Miele A, Dekker J, Peterson CL. Mechanisms that regulate localization of a  
717 DNA double-strand break to the nuclear periphery. *Genes Dev*. 2009;
- 718 46. Shibuya H, Hernández-Hernández A, Morimoto A, Negishi L, Höög C, Watanabe Y. MAJIN Links  
719 Telomeric DNA to the Nuclear Membrane by Exchanging Telomere Cap. *Cell*. 2015;163(5):1252–  
720 66.
- 721 47. Rahman MA, Terasawa M, Mostofa MG, Ushimaru T. The TORC1–Nem1/Spo7–Pah1/lipin axis  
722 regulates microautophagy induction in budding yeast. *Biochem Biophys Res Commun*.  
723 2018;504(2):505–12.
- 724 48. Rahman MA, Mostofa MG, Ushimaru T. The Nem1/Spo7–Pah1/lipin axis is required for  
725 autophagy induction after TORC1 inactivation. *FEBS J*. 2018;285(10):1840–60.
- 726 49. Kimura S, Noda T, Yoshimori T. Dynein-dependent movement of autophagosomes mediates  
727 efficient encounters with lysosomes. *Cell Struct Funct*. 2008;33(1):109–22.
- 728 50. Wijdeven RH, Janssen H, Nahidiazar L, Janssen L, Jalink K, Berlin I, et al. Cholesterol and ORP1L-  
729 mediated ER contact sites control autophagosome transport and fusion with the endocytic  
730 pathway. *Nat Commun*. 2016;7(May).
- 731 51. Johnson DE, Ostrowski P, Jaumouillé V, Grinstein S. The position of lysosomes within the cell  
732 determines their luminal pH. *J Cell Biol*. 2016;212(6):677–92.
- 733 52. Gowrishankar S, Ferguson SM. Lysosomes relax in the cellular suburbs. *J Cell Biol*.  
734 2016;212(6):617–9.
- 735 53. Korolchuk VI, Saiki S, Lichtenberg M, Siddiqi FH, Roberts EA, Imarisio S, et al. Lysosomal  
736 positioning coordinates cellular nutrient responses. *Nat Cell Biol*. 2011;13(4):453–62.
- 737 54. Almacellas E, Pelletier J, Day C, Ambrosio S, Tauler A, Mauvezin C. Lysosomal degradation  
738 ensures accurate chromosomal segregation to prevent chromosomal instability. *Autophagy*  
739 [Internet]. 2021;17(3):796–813. Available from:  
740 <https://doi.org/10.1080/15548627.2020.1764727>
- 741 55. Zhao Q, Gao SM, Wang MC. Molecular Mechanisms of Lysosome and Nucleus Communication.  
742 *Trends Biochem Sci* [Internet]. 2020;45(11):978–91. Available from:  
743 <https://doi.org/10.1016/j.tibs.2020.06.004>
- 744 56. Loewen CJR, Gazpar ML, Jesch SA, Delon C, Ktistakis NT, Henry SA, et al. Phospholipid  
745 metabolism regulated by a transcription factor sensing phosphatidic acid. *Science* (80) 2004  
746

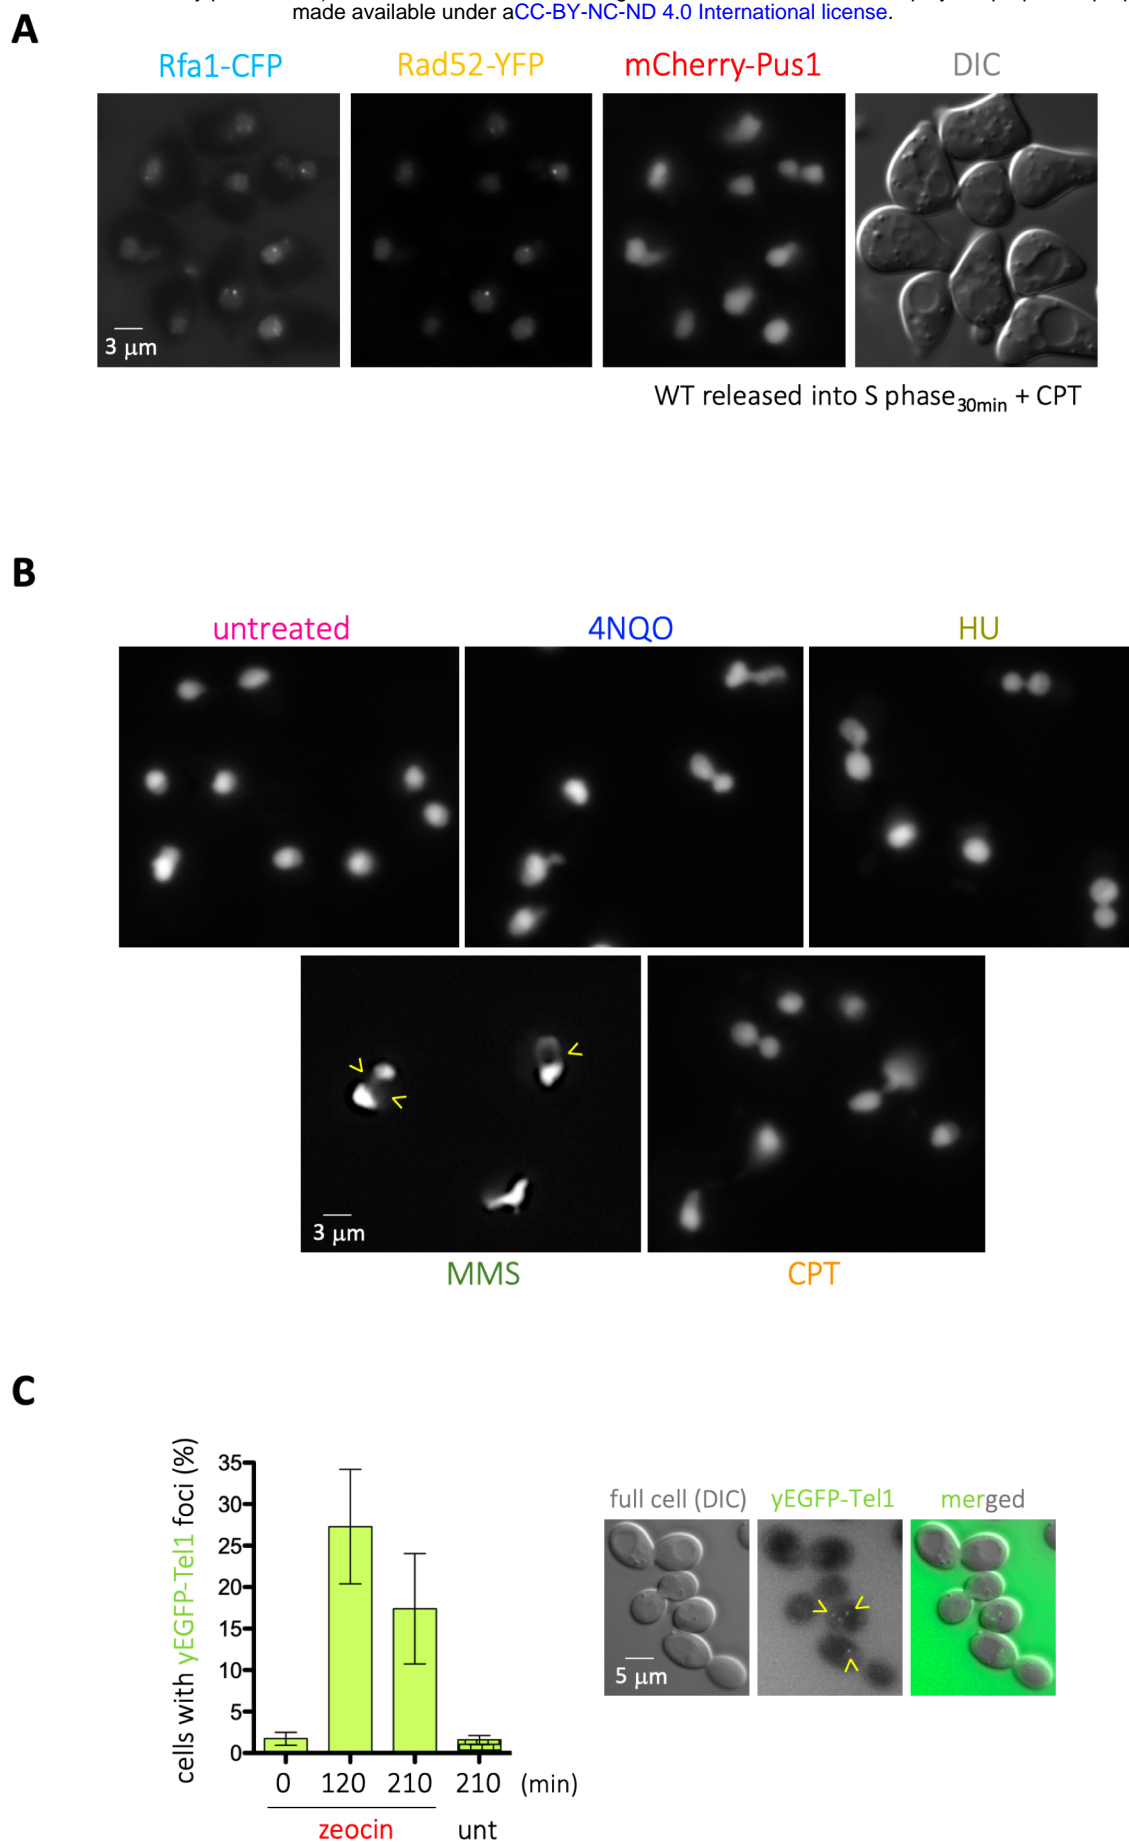

**Figure S1. Additional information related to Figure 1.**

**(A)** Illustrative images of a canonical experiment in which we monitor the ability of DNA repair proteins (Rad52-YFP, Rfa1-CFP) to form foci using mCherry-Pus1 as a marker to define the nucleus boundaries.

**(B)** Illustrative images of nuclei, as revealed by the mCherry-Pus1 signals, in response to the different genotoxins used in Figure 1. Deformations reminiscent to holes are indicated by yellow arrowheads.

**(C)** Quantification of the percentage of cells displaying yEGFP-Tel1 foci in response to 100 μg/mL zeocin while growing in minimal medium at the indicated times. One illustrative image of the events being counted is shown.

**A**

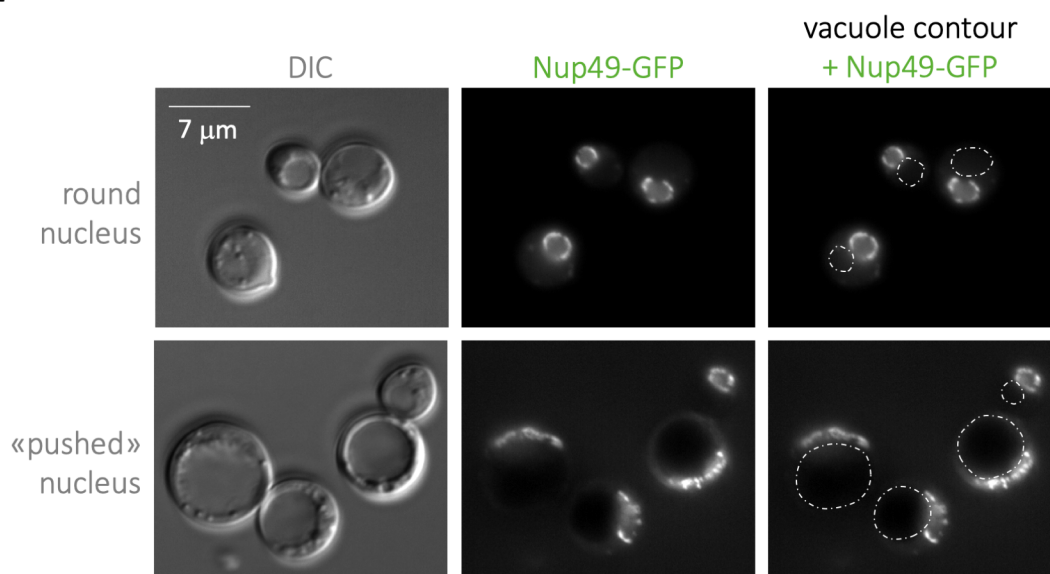

**B**

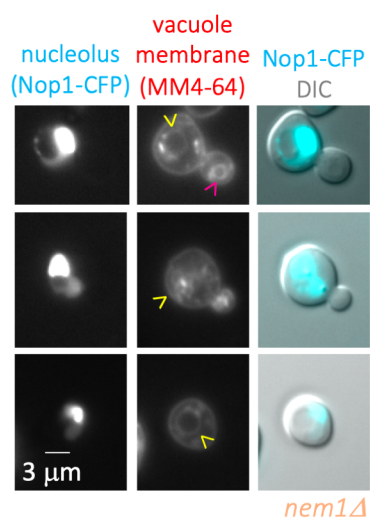

**C**

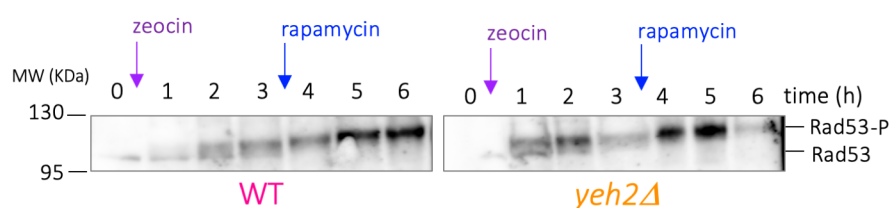

**Figure S2. Additional information related to Figures 3 & 4**

(A) Cells bearing a GFP-tagged Nup49 in order to define the nuclear periphery were pictured at two moments during growth, namely at late exponential phase (top) or after nutrient exhaustion (bottom). The vacuole contour, as drawn from the DIC images, is over-imposed on the Nup49-GFP images to appreciate how it can, when enlarged, push nuclei.

(B) The *nem1Δ* strain, transformed with the vector expressing Nop1-CFP, was simultaneously dyed with the vacuole membrane marker MM4-64. Nop1-CFP signals are overexposed to allow the visualization of the nucleolar hole, mostly present in the non-Nop1-marked part of the nucleus. The MM4-64 signal coming from the hole-residing vacuole is poor (yellow arrowheads), and contrasts with that of the MM4-64 signal coming from cytoplasmic vacuoles (pink arrowhead).

(C) The same zeocin-treated samples used for Western Blot in Figure 4A were used here to monitor (and validate) the activation of the DNA Damage Response effector Rad53, which can be visualized as a progressive phosphorylation since the addition of zeocin.
